# Supplementary material for: Ivermectin Effect on In-Hospital Mortality and Need for Respiratory Support in COVID-19 Pneumonia: Propensity Score-Matched Retrospective Study
Source: MDPI journal article supplement (doi:10.3390/v15051138), 2023-05-10
Supplement: s1 [file s1]

Supplementary tables

Supplementary Table S1. Logistic regression analysis for need of ICU admission.

|                                                     | Univariable |            |         | Multivariable |            |         |
|-----------------------------------------------------|-------------|------------|---------|---------------|------------|---------|
|                                                     | OR          | 95% CI     | P value | aOR           | 95% CI     | P value |
| Group (IVM vs control)                              | 0.91        | 0.49, 1.68 | 0.75    | 1.04          | 0.51, 2.11 | 0.92    |
| Age                                                 | 0.99        | 0.97, 1.01 | 0.18    |               |            | 0.54    |
| Sex (female vs male)                                | 0.78        | 0.41, 1.48 | 0.45    |               |            | 0.29    |
| Country of birth (non-European vs European)         | 1.09        | 0.59, 2.03 | 0.78    |               |            | 0.59    |
| Pandemic wave (2 <sup>nd</sup> vs 1 <sup>st</sup> ) | 0.83        | 0.17, 3.99 | 0.82    |               |            | 0.19    |
| Pandemic wave (3 <sup>rd</sup> vs 1 <sup>st</sup> ) | 0.41        | 0.09, 1.94 | 0.26    |               |            | 0.23    |
| SEIMC score †                                       | 0.96        | 0.91, 1.02 | 0.17    |               |            |         |
| Days since symptoms onset                           | 0.99        | 0.92, 1.08 | 0.92    |               |            |         |
| Arterial hypertension                               | 1.20        | 0.64, 2.23 | 0.58    |               |            |         |
| Diabetes mellitus                                   | 1.84        | 0.89, 3.82 | 0.10    |               |            |         |
| Hypercholesterolemia                                | 0.67        | 0.33, 1.36 | 0.27    |               |            |         |
| Obesity                                             | 1.24        | 0.60, 2.55 | 0.57    |               |            |         |
| Smoking                                             | 1.16        | 0.28, 4.82 | 0.83    |               |            |         |
| COPD                                                | 0.44        | 0.09, 2.09 | 0.30    |               |            |         |
| Asthma                                              | 0.65        | 0.13, 3.22 | 0.60    |               |            |         |
| Chronic kidney disease                              | 0.15        | 0.02, 1.17 | 0.07    |               |            |         |
| Cerebrovascular disease                             | 0.37        | 0.04, 3.18 | 0.37    |               |            |         |
| Neoplasia                                           | 0.42        | 0.14, 1.30 | 0.13    |               |            |         |
| Inflammatory bowel disease                          | 0.68        | 0.18, 2.55 | 0.56    |               |            |         |
| ICU candidate (no vs yes)                           | 0.12        | 0.02, 0.90 | 0.04*   |               |            |         |
| ACE inhibitors                                      | 1.79        | 0.68, 4.71 | 0.24    |               |            |         |
| ARA-II                                              | 1.21        | 0.58, 2.50 | 0.62    |               |            |         |
| Inhaled corticosteroids                             | 0.64        | 0.20, 2.02 | 0.44    |               |            |         |
| Inhaled beta-agonists                               | 0.61        | 0.16, 2.27 | 0.46    |               |            |         |
| Inhaled anticholinergics                            | 0.56        | 0.12, 2.73 | 0.48    |               |            |         |
| COVID-19 diagnostic technique (antigen vs PCR)      | 1.03        | 0.48, 2.22 | 0.93    |               |            |         |
| Infiltrate at X-ray (unilateral vs bilateral)       | 0.13        | 0.02, 0.99 | 0.05*   |               |            | 0.09    |
| Systolic blood pressure (mmHg)                      | 1.01        | 0.99, 1.03 | 0.26    |               |            |         |
| Diastolic blood pressure (mmHg)                     | 0.98        | 0.95, 1.01 | 0.15    |               |            |         |
| Heart rate (beats per minute)                       | 1.00        | 0.98, 1.02 | 0.89    |               |            |         |
| Temperature (°C)                                    | 1.35        | 1.01, 1.81 | 0.05*   |               |            |         |
| O <sub>2</sub> saturation (%)                       | 0.95        | 0.91, 1.00 | 0.07    |               |            | 0.47    |
| Respiratory rate (breaths per minute)               | 1.05        | 0.95, 1.16 | 0.38    |               |            |         |
| Glucose (mg/dL)                                     | 1.00        | 0.99, 1.01 | 0.75    |               |            |         |
| Urea (mg/dL)                                        | 1.00        | 0.99, 1.01 | 0.96    |               |            |         |
| Creatinine (mg/dL)                                  | 0.97        | 0.52, 1.79 | 0.91    |               |            |         |
| eGFR (MDRD-4 method) (mL/min/1.73m <sup>2</sup> )   | 1.00        | 0.99, 1.01 | 0.97    |               |            |         |
| Bilirubin (mg/dL)                                   | 1.02        | 0.42, 2.52 | 0.96    |               |            |         |

|                                     |      |            |           |      |            |         |
|-------------------------------------|------|------------|-----------|------|------------|---------|
| GOT (UI/L)                          | 1.02 | 1.00, 1.05 | 0.05      |      |            |         |
| GGT (UI/L)                          | 1.00 | 1.00, 1.01 | 0.05      |      |            | 0.41    |
| LDH (UI/L)                          | 1.00 | 0.99, 1.01 | 0.19      |      |            |         |
| Creatinine-kinase (UI/L)            | 1.00 | 0.99, 1.00 | 0.35      |      |            |         |
| Sodium (mmol/L)                     | 1.01 | 0.97, 1.07 | 0.59      |      |            |         |
| Potassium (mmol/L)                  | 0.34 | 0.16, 0.72 | 0.005**   | 0.42 | 0.18, 0.99 | 0.05*   |
| Ferritin (µg/L)                     | 1.00 | 1.00, 1.00 | 0.46      |      |            |         |
| C-reactive protein (mg/dL)          | 1.08 | 1.04, 1.13 | <0.001*** | 1.09 | 1.03, 1.14 | 0.002** |
| Procalcitonin (ng/mL)               | 4.65 | 1.39, 15.5 | 0.01*     |      |            | 0.26    |
| Troponin I (pg/mL)                  | 0.98 | 0.96, 1.01 | 0.29      |      |            |         |
| Hemoglobin (g/L)                    | 1.00 | 0.99, 1.02 | 0.75      |      |            |         |
| Leucocytes (10 <sup>9</sup> cel/L)  | 1.09 | 0.99, 1.21 | 0.08      |      |            | 0.93    |
| Lymphocytes (10 <sup>9</sup> cel/L) | 1.16 | 0.89, 1.51 | 0.28      |      |            |         |
| Neutrophils (10 <sup>9</sup> cel/L) | 1.02 | 0.99, 1.05 | 0.22      |      |            |         |
| Platelets (10 <sup>9</sup> cel/L)   | 1.00 | 0.99, 1.00 | 0.89      |      |            |         |
| aPTT (s)                            | 1.03 | 0.98, 1.07 | 0.23      |      |            |         |
| D-dimer (mg/dL)                     | 1.18 | 0.83, 1.69 | 0.36      |      |            |         |
| Arterial pH                         | 1.02 | 0.97, 1.07 | 0.49      |      |            |         |
| Arterial pO <sub>2</sub> (mmHg)     | 1.01 | 0.99, 1.02 | 0.39      |      |            |         |
| Arterial pCO <sub>2</sub> (mmHg)    | 0.96 | 0.88, 1.05 | 0.38      |      |            |         |
| Tocilizumab                         | 3.24 | 0.70, 14.9 | 0.13      |      |            | 0.21    |
| Remdesivir                          | 1.12 | 0.59, 2.14 | 0.73      |      |            | 0.16    |
| Corticosteroids                     | NC   | NC         | NC        |      |            |         |

\*p<0.05; \*\*p<0.01; \*\*\*p<0.001

ACE; angiotensin converting enzyme, aOR, adjusted odds ratio; aOR: adjusted odds ratio; aPTT, activated partial thromboplastin time; ARA-II: angiotensin II antagonist receptors; CI, confidence interval; COPD: chronic obstructive pulmonary disease, ICU, intensive care unit; LDH, lactate dehydrogenase; OR, odds ratio PCR: polymerase chain reaction; SEIMC: Spanish Society of Infectious Diseases and Clinical Microbiology; NC: not calculable (all but 1 patient received corticosteroids)

† SEIMC score is a prediction score based on age, age-adjusted low saturation of oxygen, neutrophil-to-lymphocyte ratio, estimated glomerular filtration rate, dyspnoea and sex. It has proven to be a useful tool to predict 30-day mortality probability among hospitalised patients with COVID-19

Hosmer-Lemeshow test, p=0.96, Chi<sup>2</sup> p= 0.002, Percentage correct classification 71.3%, R<sup>2</sup>: 0.130

*Supplementary Table S2. Linear regression analysis for length of hospital stay.*

|                                                     | Univariable |              |           | Multivariable |             |         |
|-----------------------------------------------------|-------------|--------------|-----------|---------------|-------------|---------|
|                                                     | $\beta$     | 95% CI       | P value   | a $\beta$     | 95% CI      | p-value |
| Group (IVM vs control)                              | -0.09       | -1.90, 1.72  | 0.93      | 0.31          | -1.31, 1.94 | 0.70    |
| Age                                                 | 0.06        | 0.00, 0.11   | 0.04*     |               |             | 0.67    |
| Sex (female vs male)                                | -1.19       | -3.04, 0.65  | 0.20      |               |             | 0.90    |
| Country of birth (non-European vs European)         | -1.59       | -3.40, 0.21  | 0.08      |               |             | 0.72    |
| Pandemic wave (2 <sup>nd</sup> vs 1 <sup>st</sup> ) | -3.53       | -9.43, 2.37  | 0.24      |               |             |         |
| Pandemic wave (3 <sup>rd</sup> vs 1 <sup>st</sup> ) | -4.47       | -10.30, 1.38 | 0.13      |               |             |         |
| SEIMC score †                                       | 0.24        | 0.08, 0.40   | 0.004**   |               |             |         |
| Days since symptoms onset                           | -0.15       | -0.39, 0.08  | 0.20      |               |             |         |
| Arterial hypertension                               | 1.24        | -0.62, 3.11  | 0.19      |               |             |         |
| Diabetes mellitus                                   | 1.79        | -0.59, 4.17  | 0.14      |               |             |         |
| Hypercholesterolemia                                | 1.04        | -0.95, 3.03  | 0.30      |               |             |         |
| Obesity                                             | 0.97        | -1.30, 3.25  | 0.40      |               |             |         |
| Smoking                                             | 1.83        | -2.35, 5.99  | 0.39      |               |             |         |
| COPD                                                | 3.22        | -0.70, 7.14  | 0.11      |               |             |         |
| Asthma                                              | 1.95        | -2.21, 6.12  | 0.36      |               |             |         |
| Chronic kidney disease                              | 2.75        | -1.18, 6.67  | 0.17      |               |             |         |
| Cerebrovascular disease                             | 1.71        | -3.07 -6.50  | 0.48      |               |             |         |
| Neoplasia                                           | 0.98        | -1.89, 3.86  | 0.50      |               |             |         |
| Inflammatory bowel disease                          | 1.88        | -1.70, 5.47  | 0.30      |               |             |         |
| ICU candidate (no vs yes)                           | 2.61        | -1.01, 6.23  | 0.16      |               |             |         |
| ACE inhibitors                                      | 1.78        | -1.33, 4.89  | 0.26      |               |             |         |
| ARA-II                                              | -0.22       | -2.49, 2.06  | 0.85      |               |             |         |
| Inhaled corticosteroids                             | 2.51        | -0.58, 5.61  | 0.11      |               |             |         |
| Inhaled beta-agonists                               | 0.25        | -3.21, 3.71  | 0.89      |               |             |         |
| Inhaled anticholinergics                            | 3.00        | -1.15, 7.16  | 0.16      |               |             |         |
| COVID-19 diagnostic technique (antigen vs PCR)      | -2.65       | -4.97, -0.32 | 0.03*     | -2.54         | -4.59, 0.49 | 0.02*   |
| Infiltrate at X-ray (unilateral vs bilateral)       | -2.10       | -5.13, 0.94  | 0.17      |               |             |         |
| Systolic blood pressure (mmHg)                      | 0.03        | -0.03, 0.08  | 0.32      |               |             |         |
| Diastolic blood pressure (mmHg)                     | -0.04       | -0.12, 0.05  | 0.40      |               |             |         |
| Heart rate (beats per minute)                       | 0.04        | -0.01, 0.09  | 0.10      |               |             |         |
| Temperature (°C)                                    | 0.67        | -0.18, 1.53  | 0.12      |               |             |         |
| O <sub>2</sub> saturation (%)                       | -0.52       | -0.73, -0.30 | <0.001*** | -0.28         | -0.53, 0.03 | 0.03*   |
| Respiratory rate (breaths per minute)               | 0.06        | -0.25, 0.37  | 0.69      |               |             |         |
| Glucose (mg/dL)                                     | 0.01        | -0.01, 0.02  | 0.60      |               |             |         |
| Urea (mg/dL)                                        | 0.06        | 0.01, 0.10   | 0.01*     |               |             |         |
| Creatinine (mg/dL)                                  | 3.39        | 1.05, 5.74   | 0.005**   |               |             |         |
| eGFR (MDRD-4 method) (mL/min/1.73m <sup>2</sup> )   | -0.05       | -0.08, -0.01 | 0.007**   | -0.03         | -0.06, 0.01 | 0.04*   |
| Bilirubin (mg/dL)                                   | -0.16       | -3.20, 2.89  | 0.92      |               |             |         |
| GOT (UI/L)                                          | 0.01        | -0.06, 0.08  | 0.73      |               |             |         |
| GGT (UI/L)                                          | -0.01       | -0.01, 0.01  | 0.86      |               |             |         |
| LDH (UI/L)                                          | 0.01        | -0.01, 0.02  | 0.30      |               |             |         |
| Creatinine-kinase (UI/L)                            | 0.01        | 0.00, 0.02   | 0.02*     |               |             |         |

|                                     |       |              |         |        |               |         |
|-------------------------------------|-------|--------------|---------|--------|---------------|---------|
| Sodium (mmol/L)                     | 0.01  | -0.07, 0.09  | 0.78    |        |               |         |
| Potassium (mmol/L)                  | 0.32  | -1.42, 2.06  | 0.72    |        |               |         |
| Ferritin (µg/L)                     | 0.00  | -0.01, 0.01  | 0.77    |        |               |         |
| C-reactive protein (mg/dL)          | 0.18  | 0.05, 0.31   | 0.007** |        |               | 0.65    |
| Procalcitonin (ng/mL)               | 5.71  | 2.08, 9.34   | 0.002** | 4.18   | 0.82, 7.54    | 0.02*   |
| Troponin I (pg/mL)                  | 0.08  | 0.00, 0.16   | 0.04*   |        |               | 0.86    |
| Hemoglobin (g/L)                    | -0.01 | -0.06, 0.03  | 0.56    |        |               |         |
| Leucocytes (10 <sup>9</sup> cel/L)  | 0.17  | -0.13, 0.47  | 0.26    |        |               |         |
| Lymphocytes (10 <sup>9</sup> cel/L) | 0.56  | 0.14, 0.98   | 0.01*   | 0.58   | 0.21, 0.95    | 0.003** |
| Neutrophils (10 <sup>9</sup> cel/L) | 0.07  | -0.01, 0.16  | 0.084   |        |               | 0.80    |
| Platelets (10 <sup>9</sup> cel/L)   | -0.01 | -0.02, -0.00 | 0.030*  | -0.010 | -0.02, -0.002 | 0.02*   |
| aPTT (s)                            | 0.12  | -0.05, 0.29  | 0.16    |        |               |         |
| D-dimer (mg/dL)                     | 0.80  | -0.41, 2.01  | 0.19    |        |               |         |
| Arterial pH                         | -7.30 | -39.4, 24.8  | 0.65    |        |               |         |
| Arterial pO <sub>2</sub> (mmHg)     | -0.01 | -0.06, 0.05  | 0.84    |        |               |         |
| Arterial pCO <sub>2</sub> (mmHg)    | -0.23 | -0.49, 0.03  | 0.086   |        |               |         |
| Tocilizumab                         | 7.62  | 1.02, 14.30  | 0.02*   | 8.81   | 3.05, 14.60   | 0.003** |
| Remdesivir                          | 1.88  | 0.01, 3.75   | 0.05*   |        |               | 0.92    |
| Corticosteroids                     | NC    | NC           | NC      |        |               |         |

\*p<0.05; \*\*p<0.01; \*\*\*p<0.001

ACE; angiotensin converting enzyme, aOR, adjusted odds ratio; aPTT, activated partial thromboplastin time; ARA-II: angiotensin II antagonist receptors; CI, confidence interval; COPD: chronic obstructive pulmonary disease, ICU, intensive care unit; LDH, lactate dehydrogenase; OR, odds ratio PCR: polymerase chain reaction; SEIMC: Spanish Society of Infectious Diseases and Clinical Microbiology; NC: not calculable (all but 1 patient received corticosteroids)

† SEIMC score is a prediction score based on age, age-adjusted low saturation of oxygen, neutrophil-to-lymphocyte ratio, estimated glomerular filtration rate, dyspnoea and sex. It has proven to be a useful tool to predict 30-day mortality probability among hospitalised patients with COVID-19

ANOVA F p-value: <0.001, R<sup>2</sup>: 0.265, Durbin-Watson: 1.95
